# Supplementary material for: Reversible modulation of π-association between 3,6-disubstituted carbazole ligands in a multistep assembling process
Source: Royal Society of Chemistry journal article supplement (doi:10.1039/c001287d), 2010-01-01
Supplement: c001287d.pdf [file c001287d.pdf]

## **Electronic supplementary information**

### **Reversible modulation of $\pi$ -association between 3,6-disubstituted carbazole ligands in a multistep assembling process**

Norie Inukai, Junpei Yuasa\*, and Tsuyoshi Kawai\*

*Graduate School of Materials Science, Nara Institute of Science and Technology, 8916-5  
Takayamacho, Ikoma, Nara 630-0192, Japan,*

\* To whom correspondence should be addressed.

E-mail: tkawai@ms.naist.jp

## Experimental Section

**General.**  $^1\text{H}$  NMR spectra were measured with JEOL AL-300N FT NMR SYSTEM (300 MHz). Thin layer chromatography (TLC) was performed on aluminum plates coated with aluminum oxide gel 60 F254 (Merck). Chemicals were purchased from Wako Pure Chemical Industries Ltd. and used as received without further purification. Acetonitrile (MeCN) used as a solvent was obtained from Nacalai Tesque. X-ray diffraction profile was collected and analyzed with an X-ray diffractometer (Rigaku R-Axis RAPID/s) with the Mo  $K\alpha$  radiation.

**Spectral Measurements.** Formation of  $\text{Zn}^{2+}$  complexes of  $[(\text{Im}_2\text{Cz})_4\text{-Zn}^{2+}]_2$ ,  $(\text{Im}_2\text{Cz})_3\text{-Zn}^{2+}$ , and  $(\text{ImBrCz})_3\text{-Zn}^{2+}$  was examined from the UV-vis spectral change of  $\text{Im}_2\text{Cz}$  in the presence of various concentrations of  $\text{Zn}^{2+}$  by using a Jasco V-660 spectrophotometer. Formation of the  $[(\text{Im}_2\text{Cz})_4\text{-Zn}^{2+}]_2$  and  $(\text{Im}_2\text{Cz})_3\text{-Zn}^{2+}$  complexes was also examined from the fluorescence spectral change of  $\text{Im}_2\text{Cz}$  in the presence of various concentrations of  $\text{Zn}^{2+}$  by a HITACHI F-4500 Fluorescence spectrometer. The  $(\text{Im}_2\text{Cz})_3\text{-Zn}^{2+}$  and  $[(\text{ImBrCz})_3\text{-Zn}^{2+}]$  complexes were detected by ESI-MS. HRMS (ESI-MS) of  $[(\text{ImBrCz})_3\text{-Zn}^{2+}]$ :  $m/z$  calcd. for  $\{[\text{Zn}(\text{C}_{20}\text{H}_{16}\text{BrN}_3)_3](\text{OSO}_2\text{CF}_3)\}^+([\text{M}]^+)$ , 1344.03945; found 1344.03944 (S3). Mass spectra (ESI-MS and FAB-MS) were measured with mass spectrometers (JEOL JMS-700 MStation). All measurements were performed at room temperature. The reactivity of  $[(\text{Im}_2\text{Cz})_4\text{-Zn}^{2+}]_2$  and  $(\text{Im}_2\text{Cz})_3\text{-Zn}^{2+}$  complexes to toluene were investigated respectively by the UV-vis spectral changes of MeCN solutions of  $\text{Im}_2\text{Cz}$  ( $3.4 \times 10^{-4} \text{ mol dm}^{-3}$ ) containing  $\text{Zn}^{2+}$  ( $1.0 \times 10^{-4} \text{ mol dm}^{-3}$ ) (Fig. S9a) and that of  $\text{Im}_2\text{Cz}$  ( $2.5 \times 10^{-4} \text{ mol dm}^{-3}$ ) containing  $\text{Zn}^{2+}$  ( $1.5 \times 10^{-4} \text{ mol dm}^{-3}$ ) (Fig. S9b) observed upon addition of toluene in the presence of  $\text{H}_2\text{O}$  ( $0.22 \text{ mol dm}^{-3}$ ) at 298 K. In the case of  $[(\text{Im}_2\text{Cz})_4\text{-Zn}^{2+}]_2$ , the absorption spectrum of  $[(\text{Im}_2\text{Cz})_4\text{-Zn}^{2+}]_2$  was changed to that of free  $\text{Im}_2\text{Cz}$  (Fig. S9a blue line) by the presence of toluene ( $5.2 \times 10^{-2} \text{ mol dm}^{-3}$ ), whereas no notable absorption spectrum change was observed in the spectral titration of  $(\text{Im}_2\text{Cz})_3\text{-Zn}^{2+}$  by toluene ( $0\text{-}9.6 \times 10^{-2} \text{ mol dm}^{-3}$ ) [Fig. S9b]. A small amount of  $\text{H}_2\text{O}$  was added to a MeCN solution of the  $\text{Im}_2\text{Cz-Zn}^{2+}$  system to stabilize the  $\text{Zn}^{2+}$  ions dispersed from  $[(\text{Im}_2\text{Cz})_4\text{-Zn}^{2+}]_2$  complex, inducing the equilibrium shift toward the dissociation of  $[(\text{Im}_2\text{Cz})_4\text{-Zn}^{2+}]_2$ .

**Preparation of 9-ethyl-3,6-bis[(trimethylsilyl)ethynyl]-9-carbazole (1a):** To a flask containing  $\text{Pd}(\text{PPh}_3)_2\text{Cl}_2$  (180 mg, 0.25 mmol),  $\text{CuI}$  (30 mg, 0.15 mmol), and 3,6-dibromo-9-ethylcarbazole (3.1 g, 8.6 mmol) were added (trimethylsilyl)acetylene (2.7 g, 18.7 mmol) in diisopropylamine (30 mL) and tetrahydrofuran (50 mL). The flask was then evacuated and backfilled with nitrogen three times. The mixture was stirred at  $60^\circ\text{C}$  under  $\text{N}_2$  atmosphere for 14 h and then filtered. The filtrate was extracted with chloroform, washed with brine and dried over  $\text{MgSO}_4$  and then filtered. The filtrate was concentrated and subjected to column chromatography on silica gel (hexane/chloroform 1:15) to afford a yellow solid (900 mg, 27 %).  $^1\text{H}$  NMR ( $\text{CDCl}_3$ , 300 MHz):  $\delta$  8.20 (s, 2H), 7.58 (d,  $J = 8.4$  Hz, 2H), 7.31 (d,  $J = 8.4$  Hz, 2H), 4.33 (q,  $J = 7.2$  Hz, 2H), 1.42 (t,  $J = 7.2$  Hz, 3H), 0.29 (s, 18H).

**Preparation of 9-ethyl-3,6-bis[(1-methyl-1H-imidazol-2-yl)ethynyl]-9-carbazole ( $\text{Im}_2\text{Cz}$ ):** A 100

ml four necked flask was charged with 2-iodo-1-methylimidazole (770 mg, 3.7 mmol), 9-ethyl-3,6-bis[(trimethylsilyl)ethynyl]-9-carbazole (700 mg, 1.8 mmol), CuI (6.3 mg, 0.03 mmol), PPh<sub>3</sub> (230 mg, 0.88 mmol), and tetra-*n*-butylammonium fluoride (in THF 1 mol/L, 2.8 mL) in THF/diisopropylamine (20 ml/10 ml). After the solution was degassed by bubbling with N<sub>2</sub> gas for 30 min, Pd(PPh<sub>3</sub>)<sub>2</sub>Cl<sub>2</sub> (57 mg, 0.081 mmol) was added to the reaction flask. Then, the reaction mixture was stirred at 70 °C under Ar atmosphere for 40 hours. The reaction was left to cool and organic phase was extracted with chloroform washed with brine and dried over MgSO<sub>4</sub>. The filtrate was concentrated subjected to column chromatography on aluminum oxide (chloroform/acetic ether 15:1). Then Im<sub>2</sub>Cz was purified by GPC with chloroform and preparative HPLC with acetonitrile. The crude product was recrystallized in acetonitrile to provide yellow solid (570 mg, 44 %). <sup>1</sup>H NMR (300 MHz, CD<sub>3</sub>CN): δ 8.31 (s, 2H), 7.64 (d, *J* = 8.4 Hz, 2H), 7.49 (d, *J* = 8.4 Hz, 2H), 7.06 (s, 2H), 7.00 (s, 2H), 4.35 (q, *J* = 7.1 Hz, 2H), 3.76 (s, 6H), 1.33 (t, *J* = 7.1 Hz, 3H). Anal. Calcd for C<sub>26</sub>H<sub>21</sub>N<sub>5</sub>: C, 77.40; H, 5.25; N, 17.36. Found: C, 77.31; H, 4.98; N, 17.51.

**Preparation of 3-bromo-9-ethyl-6-((trimethylsilyl)ethynyl)-9H-carbazole (2a):** To a flask containing Pd(PPh<sub>3</sub>)<sub>2</sub>Cl<sub>2</sub> (220 mg, 0.31 mmol), CuI (52 mg, 0.27 mmol), and 3,6-dibromo-9-ethylcarbazole (5.6 g, 16 mmol) were added (trimethylsilyl)acetylene (1.8 g, 17.9 mmol) in diisopropylamine (60 mL) and tetrahydrofuran (150 mL). The flask was then evacuated and backfilled with nitrogen three times. The mixture was stirred at 70 °C under N<sub>2</sub> atmosphere for 14 h and was concentrated and subjected to column chromatography on silica gel (hexane/dichloromethane 1:1) to afford a yellow solid (2.2 g, 37 %). <sup>1</sup>H NMR (CDCl<sub>3</sub>, 300 MHz): δ 8.17 (d, *J* = 1.5 Hz, 1H), 8.15 (d, *J* = 1.8 Hz, 1H), 7.58 (dd, *J* = 8.4, 1.5 Hz, 1H), 7.54 (dd, *J* = 8.4, 1.8 Hz, 1H), 7.28 (d, *J* = 3.3 Hz, 1H), 7.25 (d, *J* = 3.3 Hz, 1H), 4.31 (q, *J* = 7.2 Hz, 2H), 1.40 (t, *J* = 7.2 Hz, 3H), 0.29 (s, 9H).

**Preparation of 3-bromo-9-ethyl-6-((1-methyl-1H-imidazol-2-yl)ethynyl)-9H-carbazole (ImBrCz):** A 200 ml four necked flask was charged with 2-iodo-1-methylimidazole (560 mg, 2.7 mmol), 9-ethyl-3,6-bis[(trimethylsilyl)ethynyl]-9-carbazole (1.0 g, 2.7 mmol), CuI (88 mg, 0.46 mmol), PPh<sub>3</sub> (350 mg, 1.33 mmol), and tetra-*n*-butylammonium fluoride (in THF 1 mol/L, 4.3 mL) in THF/diisopropylamine (120 ml/40 ml). After the solution was degassed by bubbling with N<sub>2</sub> gas for 30 min, Pd(PPh<sub>3</sub>)<sub>2</sub>Cl<sub>2</sub> (110 mg, 0.16 mmol) was added to the reaction flask. Then, the reaction mixture was stirred at 70 °C under Ar atmosphere for 20 hours. The filtrate was concentrated and subjected to column chromatography on aluminum oxide (chloroform/hexane 1:1). Then ImBrCz was purified by preparative HPLC with acetonitrile. The crude product was recrystallized in chloroform to provide yellow solid (655 mg, 64 %). <sup>1</sup>H NMR (300 MHz, CD<sub>3</sub>CN): δ 8.25 (d, *J* = 1.5 Hz, 1H), 8.19 (d, *J* = 1.8 Hz, 1H), 7.68 (dd, *J* = 8.7, 1.5 Hz, 1H), 7.58 (dd, *J* = 8.7, 1.8 Hz, 1H), 7.38 (d, *J* = 8.7 Hz, 1H), 7.30 (d, *J* = 8.7 Hz, 1H), 7.10 (s, 1H), 6.95 (s, 1H), 4.35 (q, *J* = 7.2 Hz, 2H), 3.84 (s, 3H), 1.43 (t, *J* = 7.2 Hz, 3H). HRMS (FAB): *m/z* calcd. for C<sub>20</sub>H<sub>16</sub>BrN<sub>3</sub> ([M]<sup>+</sup>), 377.0528; found 377.0528.

**<sup>1</sup>H NMR assignment of [(Im<sub>2</sub>Cz)<sub>4</sub>-Zn<sup>2+</sup>]<sub>2</sub>:** Both [(Im<sub>2</sub>Cz)<sub>4</sub>-Zn<sup>2+</sup>]<sub>2</sub> and (Im<sub>2</sub>Cz)<sub>3</sub>-Zn<sup>2+</sup> complexes were

formed in a  $\text{CD}_3\text{CN}$  solution of  $\text{Im}_2\text{Cz}$  ( $6.8 \times 10^{-2} \text{ mol dm}^{-3}$ ) containing  $\text{Zn}^{2+}$  ( $2.1 \times 10^{-2} \text{ mol dm}^{-3}$ ) at 298 K. Under these conditions, exchange between  $(\text{Im}_2\text{Cz})_3\text{-Zn}^{2+}$  and  $[(\text{Im}_2\text{Cz})_4\text{-Zn}^{2+}]_2$  is rapid on the NOE time scale. This makes it difficult to discuss the intramolecular  $\pi$ -stacking interactions of  $[(\text{Im}_2\text{Cz})_4\text{-Zn}^{2+}]_2$  in light of an intermolecular through-space magnetic interaction from NOE experiments, but enables us to identify the  $^1\text{H}$  NMR assignment of  $[(\text{Im}_2\text{Cz})_4\text{-Zn}^{2+}]_2$  by  $^1\text{H}$  NMR,  $^1\text{H}$ ,  $^1\text{H}$  COSY NMR, and NOE experiments as follow. When irradiated at the doublet peak of 5.73 ppm due to the  $\text{C}_1\text{-H}$  protons of  $[(\text{Im}_2\text{Cz})_4\text{-Zn}^{2+}]_2$ , NOE signals were detected for the  $\text{C}_1\text{-H}$  protons of  $[(\text{Im}_2\text{Cz})_4\text{-Zn}^{2+}]_2$  at 7.52, 7.64, and 7.14 ppm overlapping with the  $\text{C}_1\text{-H}$  proton of  $(\text{Im}_2\text{Cz})_3\text{-Zn}^{2+}$  at 7.15 ppm under these conditions. Then, we identified the neighboring  $\text{C}_2\text{-H}$  protons of  $[(\text{Im}_2\text{Cz})_4\text{-Zn}^{2+}]_2$  from the  $^1\text{H}$ ,  $^1\text{H}$  COSY NMR spectrum obtained under the same experimental conditions. In the  $^1\text{H}$ ,  $^1\text{H}$  COSY NMR spectrum, the doublet peaks at 6.81, 6.97, 7.13, and 7.67 ppm correspond to the  $\text{C}_2\text{-H}$  protons lying next to the  $\text{C}_1\text{-H}$  protons of  $[(\text{Im}_2\text{Cz})_4\text{-Zn}^{2+}]_2$  at 7.64, 5.73, 7.52, and 7.14 ppm, respectively. As expected, NOE signals were detected for the  $\text{C}_2\text{-H}$  protons of  $[(\text{Im}_2\text{Cz})_4\text{-Zn}^{2+}]_2$  at 6.97, 7.13, and 7.67 ppm, when irradiated at the doublet peak of 6.81 ppm due to the  $\text{C}_2\text{-H}$  proton of  $[(\text{Im}_2\text{Cz})_4\text{-Zn}^{2+}]_2$ . NOE signals were also detected for the  $\text{C}_4\text{-H}$  protons of  $[(\text{Im}_2\text{Cz})_4\text{-Zn}^{2+}]_2$  at 6.55, 8.02 (8H), and 8.19 ppm, when irradiated at the singlet peak of 8.70 ppm due to the  $\text{C}_4\text{-H}$  proton of  $(\text{Im}_2\text{Cz})_3\text{-Zn}^{2+}$ . Similarly, NOE signals were observed for the imidazole protons of  $[(\text{Im}_2\text{Cz})_4\text{-Zn}^{2+}]_2$  at 6.49, 7.14, 7.19, 7.32, 7.34, 7.38, 7.46, and 7.55 ppm when irradiated at the singlet peak of 7.34 ppm due to the imidazole protons of  $(\text{Im}_2\text{Cz})_3\text{-Zn}^{2+}$ . In the presence of high concentrations of  $\text{Im}_2\text{Cz}$  ( $6.8 \times 10^{-2} \text{ mol dm}^{-3}$ ) containing  $\text{Zn}^{2+}$  ( $2.1 \times 10^{-2} \text{ mol dm}^{-3}$ ),  $\text{Im}_2\text{Cz}$  forms other minor complexes, which may be higher-ordered complexes with  $\text{Zn}^{2+}$ . The NOE signals of these complexes are denoted as asterisks in Fig. S5. Although such other minor complexes could not be identified accurately, it should be noted that only  $[(\text{Im}_2\text{Cz})_4\text{-Zn}^{2+}]_2$  and  $(\text{Im}_2\text{Cz})_3\text{-Zn}^{2+}$  complexes were formed under the experimental conditions as employed for the UV-vis and  $^1\text{H}$  NMR titration (Fig. 1 and 2a, respectively).

In the preliminary experiment, we tried to determine the crystal structures of these complexes. Despite our systematic screening for suitable crystallization conditions, evaporation rate, solvent, temperature etc (it was a one year trial), unfortunately, we were unsuccessful in our attempts to grow single crystals of these complexes at present. The  $[(\text{Im}_2\text{Cz})_4\text{-Zn}^{2+}]_2$  and  $(\text{Im}_2\text{Cz})_3\text{-Zn}^{2+}$  complexes can interconvert between them, because these complexes are on a relatively flat potential energy surface ( $\Delta G = 16 \text{ kJ mol}^{-1}$  at 298 K). These effects seem to make us difficult to obtain X-ray crystal structures. At the same time, however, this unique assembling feature of  $\text{Im}_2\text{Cz}$  allows us to create new supramolecular systems, where it undergoes reversible conformational changes caused by subtle changes in the environment.

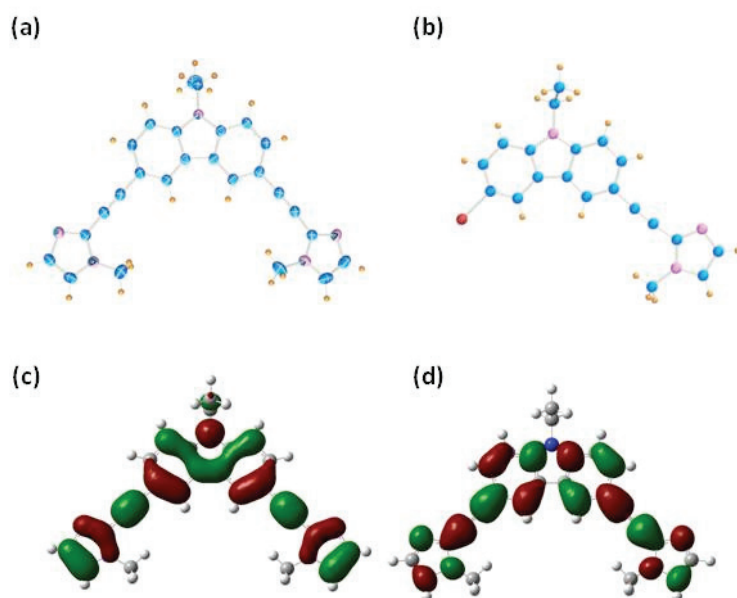

**Fig. S1** ORTEP drawing (50% probability) of (a) Im<sub>2</sub>Cz and (b) ImBrCz. Color code: blue sphere, C; purple sphere, N; yellow sphere, H; red sphere, Br. (c) HOMO and (d) LUMO orbitals of Im<sub>2</sub>Cz calculated by DFT method with Gaussian 03 (B3LYP/6-31G\* basis set).

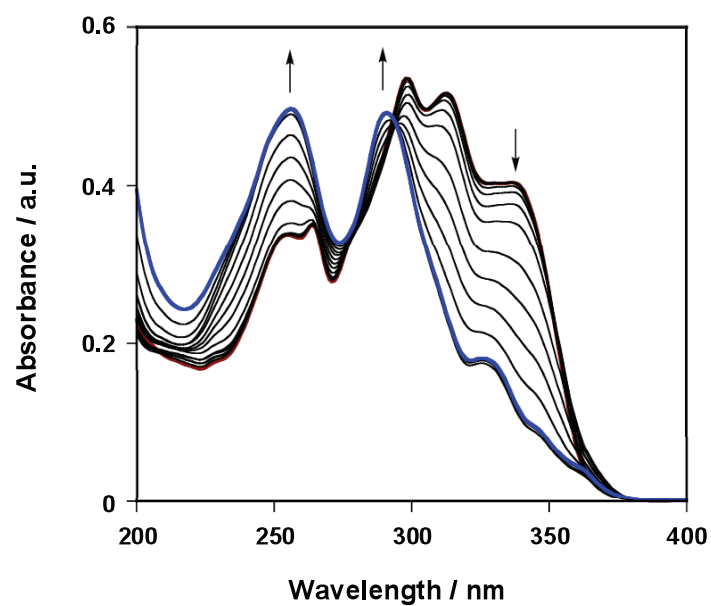

**Fig. S2** Observed UV-vis absorption spectral changes upon addition of Zn<sup>2+</sup> [0 mol dm<sup>-3</sup> (red line) – 1.3 × 10<sup>-5</sup> mol dm<sup>-3</sup> (blue line)] to a MeCN solution of Im<sub>2</sub>Cz (2.1 × 10<sup>-5</sup> mol dm<sup>-3</sup>) at 298 K.

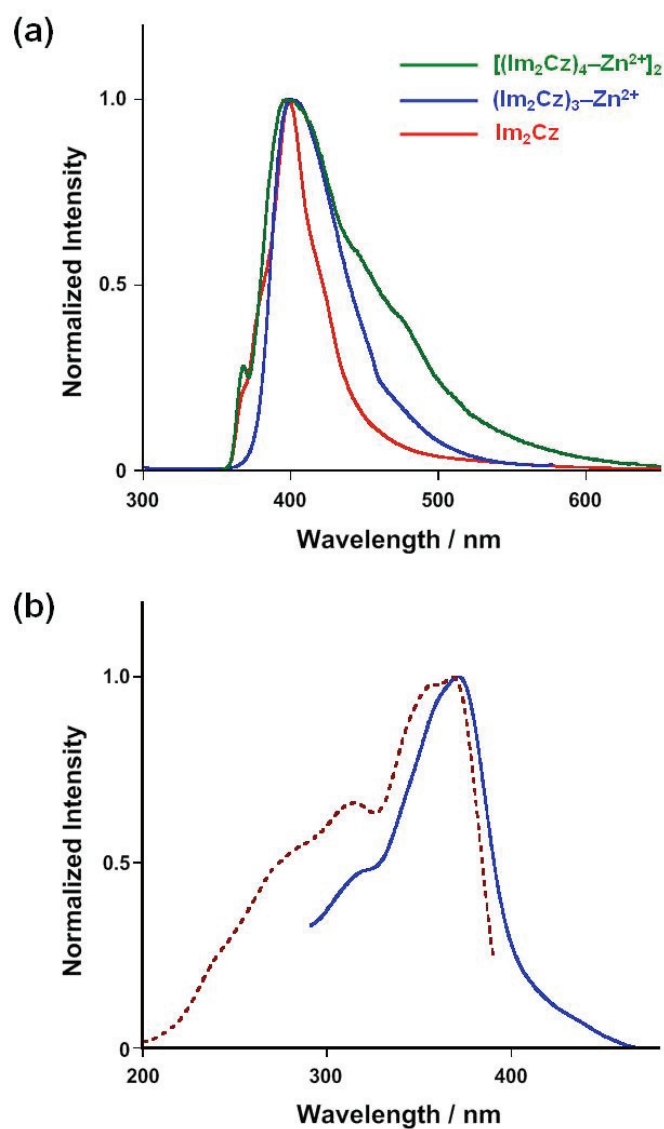

**Fig. S3** (a) Normalized emission spectra of Im<sub>2</sub>Cz ( $5.4 \times 10^{-3}$  mol dm<sup>-3</sup>) in the absence (red line) and presence of Zn<sup>2+</sup> ( $8.1 \times 10^{-4}$  mol dm<sup>-3</sup>, green line;  $1.6 \times 10^{-3}$  mol dm<sup>-3</sup>, blue line) in MeCN at 298 K. (b) Excitation spectra of Im<sub>2</sub>Cz ( $5.4 \times 10^{-3}$  mol dm<sup>-3</sup>) in the presence of Zn<sup>2+</sup> ( $8.1 \times 10^{-4}$  mol dm<sup>-3</sup>) recorded at  $\lambda = 550$  nm (blue solid line) and 400 nm (red dashed line). \*[(Im<sub>2</sub>Cz)<sub>4</sub>-Zn<sup>2+</sup>]<sub>2</sub> shows a broad emission band due to  $\pi$ -stacked carbazole units at a longer wavelength region overlapping with a emission band due to free carbazole rings.

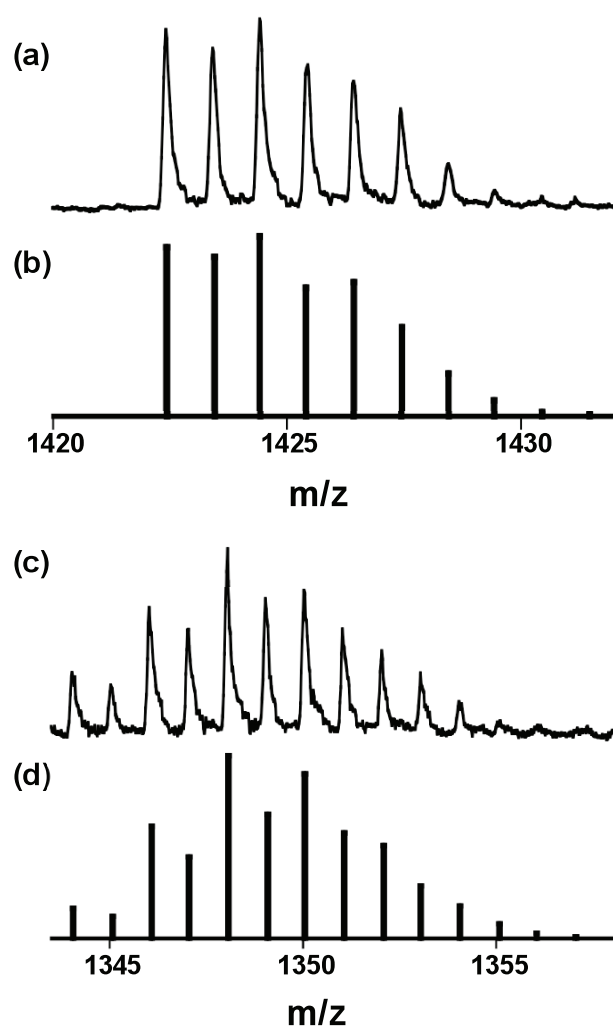

**Fig. S4** (a) Positive-ion ESI MS of a MeCN solution of  $\text{Im}_2\text{Cz}$  ( $2.5 \times 10^{-3} \text{ mol dm}^{-3}$ ) in the presence of  $1.2 \times 10^{-3} \text{ mol dm}^{-3}$  of  $\text{Zn}^{2+}$ . The signal at  $m/z$  1422.4 corresponds to  $\{[\text{Zn}(\text{Im}_2\text{Cz})_3](\text{OSO}_2\text{CF}_3)\}^+$ . (c) HRMS (ESI-MS) of a MeCN solution of  $\text{ImBrCz}$  ( $3.1 \times 10^{-4} \text{ mol dm}^{-3}$ ) in the presence of  $2.1 \times 10^{-4} \text{ mol dm}^{-3}$  of  $\text{Zn}^{2+}$ . The signal at  $m/z$  1344.0394 corresponds to  $\{[\text{Zn}(\text{ImBrCz})_3](\text{OSO}_2\text{CF}_3)\}^+$ . (b), (d) Calculated isotopic distributions for  $\{[\text{Zn}(\text{Im}_2\text{Cz})_3](\text{OSO}_2\text{CF}_3)\}^+$  and  $\{[\text{Zn}(\text{ImBrCz})_3](\text{OSO}_2\text{CF}_3)\}^+$ , respectively.



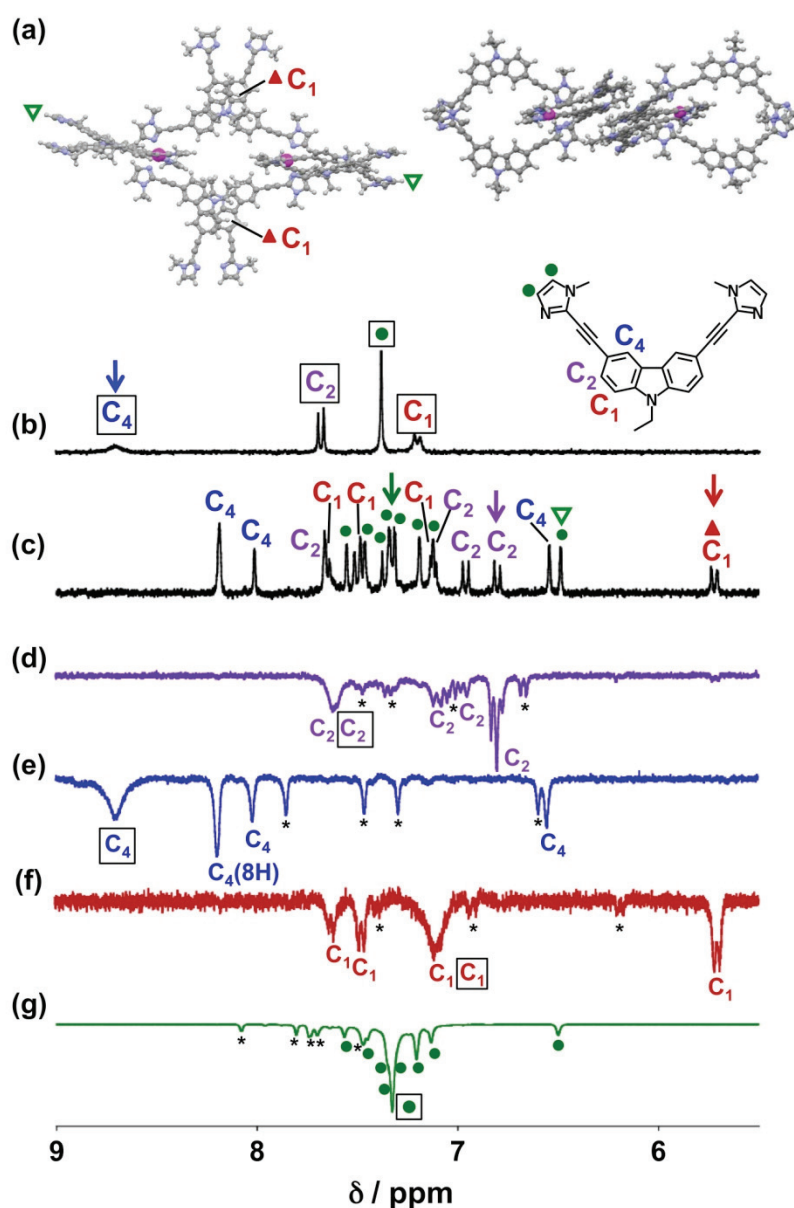

**Fig. S5** (a) The structures of  $[(\text{Im}_2\text{Cz})_4\text{-Zn}^{2+}]_2$  modeled by MMFF94: top view (left) and front view (right).  $^1\text{H}$  NMR spectra of (b)  $(\text{Im}_2\text{Cz})_3\text{-Zn}^{2+}$  and (c)  $[(\text{Im}_2\text{Cz})_4\text{-Zn}^{2+}]_2$  in  $\text{CD}_3\text{CN}$  at 298 K. NOE spectra of a  $\text{CD}_3\text{CN}$  solution of  $\text{Im}_2\text{Cz}$  ( $6.8 \times 10^{-2} \text{ mol dm}^{-3}$ ) in the presence of  $\text{Zn}^{2+}$  ( $2.1 \times 10^{-2} \text{ mol dm}^{-3}$ ) at irradiation of (d) the  $\text{C}_2\text{-H}$  of  $[(\text{Im}_2\text{Cz})_4\text{-Zn}^{2+}]_2$  at  $\delta = 6.81 \text{ ppm}$ , (e) the  $\text{C}_4\text{-H}$  of  $(\text{Im}_2\text{Cz})_3\text{-Zn}^{2+}$  at  $\delta = 8.70 \text{ ppm}$  (f) the  $\text{C}_1\text{-H}$  of  $[(\text{Im}_2\text{Cz})_4\text{-Zn}^{2+}]_2$  at  $\delta = 5.73 \text{ ppm}$ , and (g) the imidazole proton of  $(\text{Im}_2\text{Cz})_3\text{-Zn}^{2+}$  at  $\delta = 7.34 \text{ ppm}$  in  $\text{CD}_3\text{CN}$  at 298 K. Numbers and symbols correspond to those in the chemical structure of  $\text{Im}_2\text{Cz}$  and the proposed structure of  $[(\text{Im}_2\text{Cz})_4\text{-Zn}^{2+}]_2$ . The asterisks denote the NOE signals of other minor complexes.

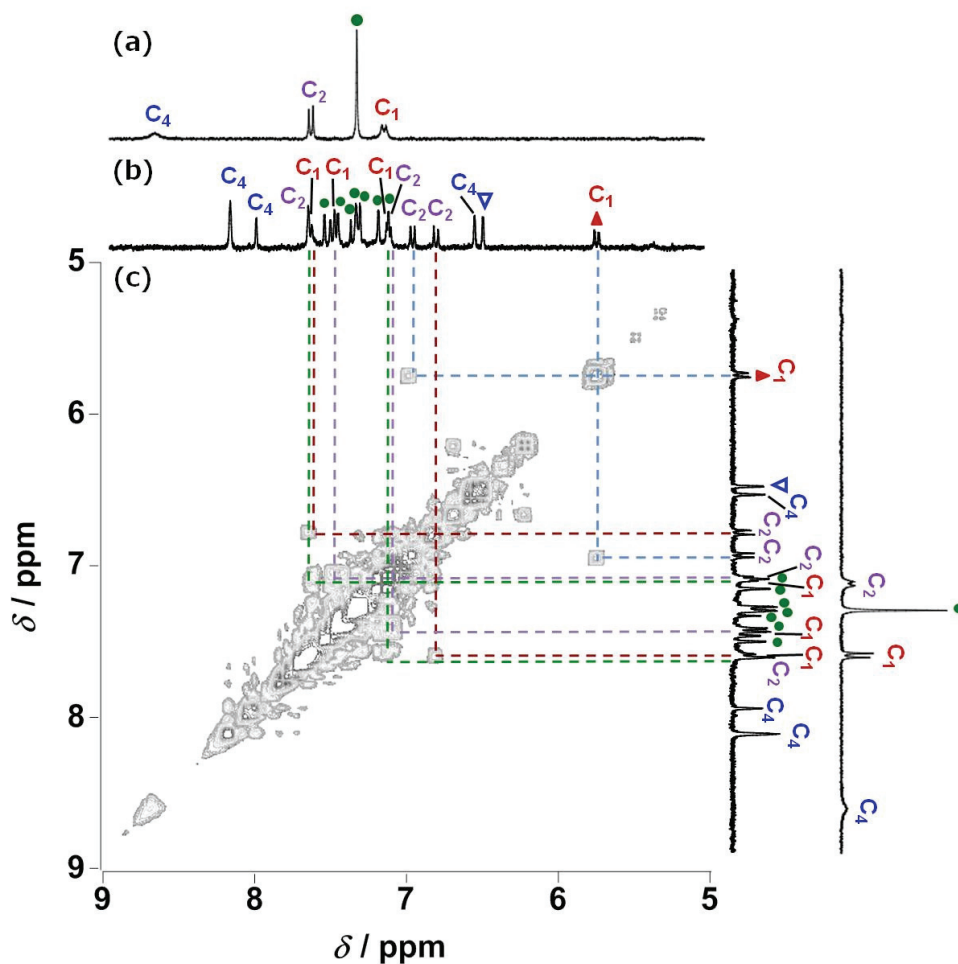

**Fig. S6**  $^1\text{H}$  NMR spectra of (a) (Im<sub>2</sub>Cz)<sub>3</sub>-Zn<sup>2+</sup> and (b) [(Im<sub>2</sub>Cz)<sub>4</sub>-Zn<sup>2+</sup>]<sub>2</sub> in CD<sub>3</sub>CN at 298 K. (c)  $^1\text{H}$ ,  $^1\text{H}$  COSY NMR spectrum of Im<sub>2</sub>Cz ( $6.8 \times 10^{-2} \text{ mol dm}^{-3}$ ) in the presence of Zn<sup>2+</sup> ( $2.1 \times 10^{-2} \text{ mol dm}^{-3}$ ) in CD<sub>3</sub>CN at 298 K.

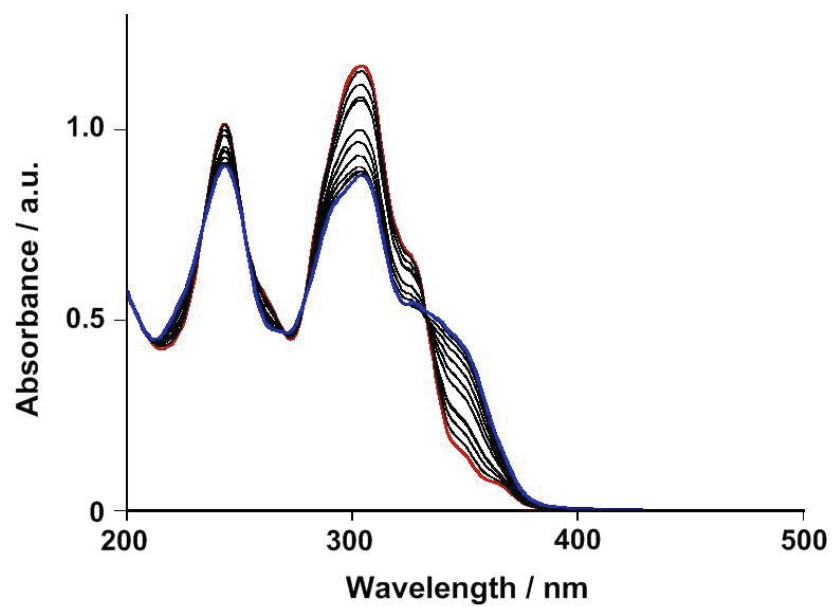

**Fig. S7** Observed UV-vis absorption spectral changes upon addition of Zn<sup>2+</sup> [0 mol dm<sup>-3</sup> (red line) – 2.1 × 10<sup>-4</sup> mol dm<sup>-3</sup> (blue line)] to a MeCN solution of ImBrCz (3.1 × 10<sup>-4</sup> mol dm<sup>-3</sup>) at 298 K.

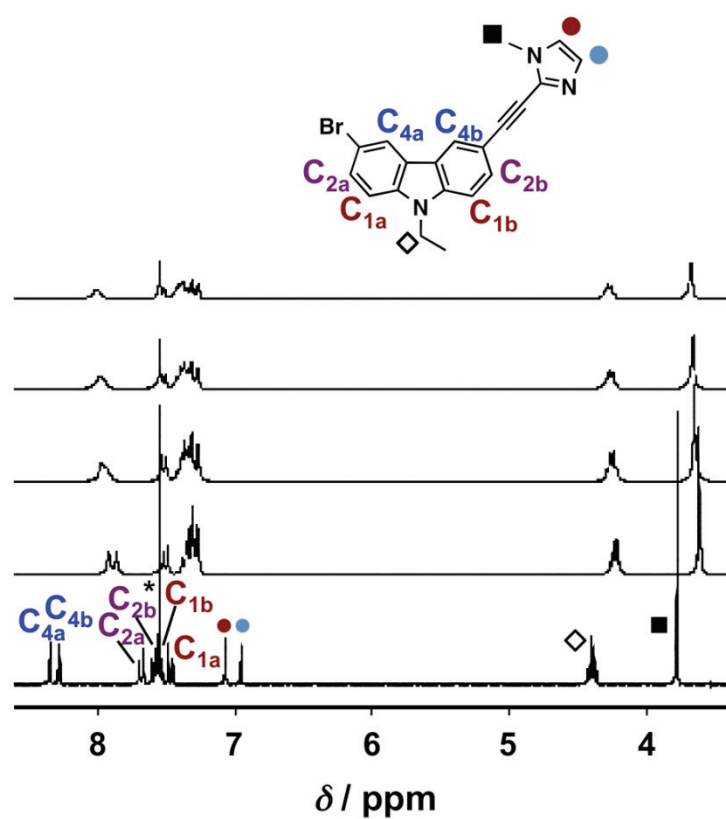

**Fig. S8** Stacked plot of <sup>1</sup>H NMR spectra of ImBrCz ( $1.7 \times 10^{-2}$  mol dm<sup>-3</sup>) in the absence and presence of 0.05, 0.24, 0.31, and 0.50 equivalents of Zn<sup>2+</sup> (from bottom to top) in CD<sub>3</sub>CN at 298 K. Numbers and symbols correspond to those in the chemical structure of ImBrCz.

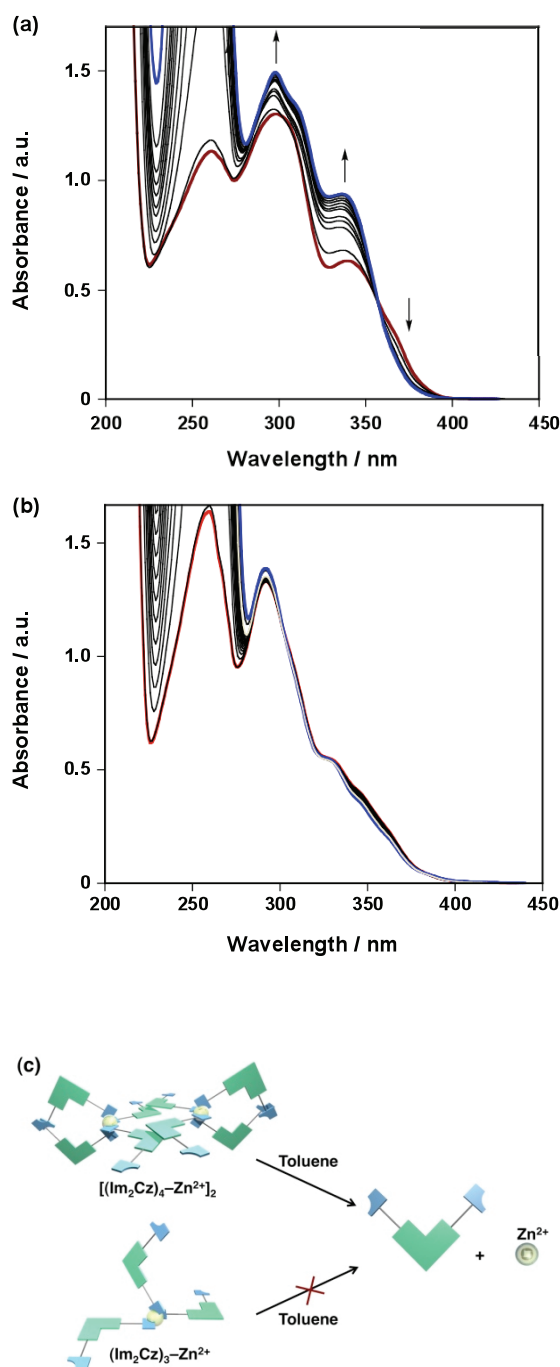

**Fig. S9** Observed UV-vis absorption spectral changes of (a)  $\text{Im}_2\text{Cz}$  ( $3.4 \times 10^{-4} \text{ mol dm}^{-3}$ ) in the presence of  $\text{Zn}^{2+}$  ( $1.0 \times 10^{-4} \text{ mol dm}^{-3}$ ) upon addition of toluene (0 to  $5.2 \times 10^{-2} \text{ mol dm}^{-3}$ ) and (b)  $\text{Im}_2\text{Cz}$  ( $2.5 \times 10^{-4} \text{ mol dm}^{-3}$ ) in the presence of  $\text{Zn}^{2+}$  ( $1.5 \times 10^{-4} \text{ mol dm}^{-3}$ ) upon addition of toluene (0 to  $9.6 \times 10^{-2} \text{ mol dm}^{-3}$ ) in MeCN containing  $\text{H}_2\text{O}$  ( $0.22 \text{ mol dm}^{-3}$ ) at 298 K. (c) Schematic representation of dispersion of  $[(\text{Im}_2\text{Cz})_4-\text{Zn}^{2+}]_2$  (top) and  $(\text{Im}_2\text{Cz})_3-\text{Zn}^{2+}$  (bottom) into  $\text{Im}_2\text{Cz}$  and  $\text{Zn}^{2+}$  in the presence of toluene.

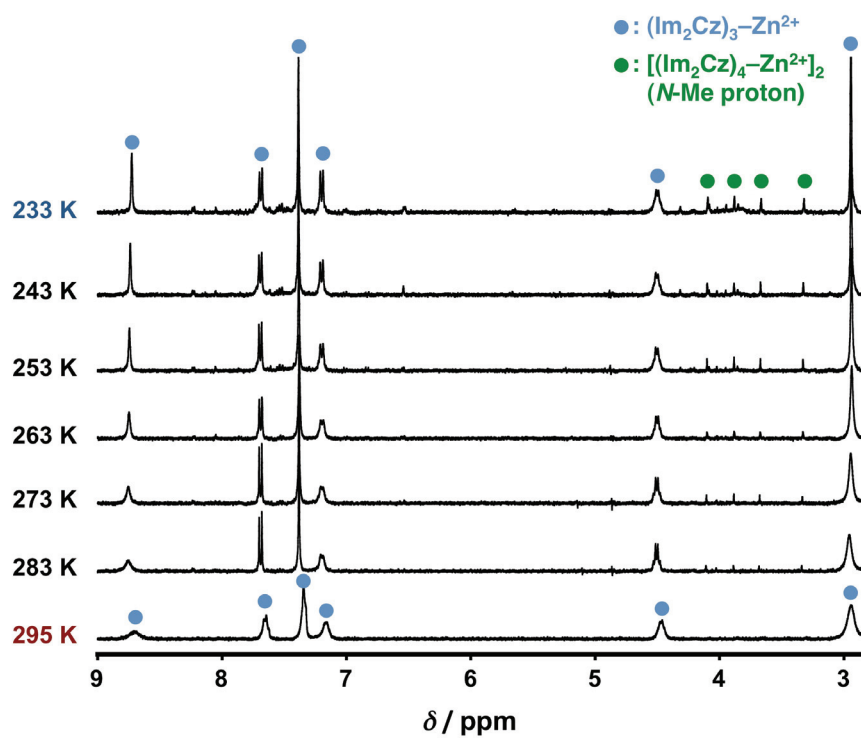

**Fig. S10** <sup>1</sup>H NMR spectra of  $\text{Im}_2\text{Cz}$  ( $3.1 \times 10^{-3} \text{ mol dm}^{-3}$ ) in the presence of  $\text{Zn}^{2+}$  ( $1.8 \times 10^{-3} \text{ mol dm}^{-3}$  in total) in  $\text{CD}_3\text{CN}$  at 233-295 K.

**Table S11** Concentrations of  $[(\text{Im}_2\text{Cz})_4\text{-Zn}^{2+}]_2$ ,  $(\text{Im}_2\text{Cz})_3\text{-Zn}^{2+}$ , and free  $\text{Zn}^{2+}$ , equilibrium constant ( $K$ ) of conversion of  $[(\text{Im}_2\text{Cz})_4\text{-Zn}^{2+}]_2$  into  $(\text{Im}_2\text{Cz})_3\text{-Zn}^{2+}$  in  $\text{CD}_3\text{CN}$  solution of  $\text{Im}_2\text{Cz}$  ( $3.1 \times 10^{-3} \text{ mol dm}^{-3}$ ) in the presence of  $\text{Zn}^{2+}$  ( $1.8 \times 10^{-3} \text{ mol dm}^{-3}$  in total) at 233-295 K.

| $T$<br>/ K | $[(\text{Im}_2\text{Cz})_4\text{-Zn}^{2+}]_2$<br>/ $\text{mol dm}^{-3}$ <sup>a</sup> | $(\text{Im}_2\text{Cz})_3\text{-Zn}^{2+}$<br>/ $\text{mol dm}^{-3}$ <sup>b</sup> | Concentration<br>of free $\text{Zn}^{2+}$<br>/ $\text{mol dm}^{-3}$ <sup>c</sup> | $K$<br>/ $\text{mol}^3 \text{ dm}^{-9}$ <sup>d</sup> |
|------------|--------------------------------------------------------------------------------------|----------------------------------------------------------------------------------|----------------------------------------------------------------------------------|------------------------------------------------------|
| 233        | $5.4 \times 10^{-5}$                                                                 | $8.9 \times 10^{-4}$                                                             | $8.0 \times 10^{-4}$                                                             | $3.7 \times 10^{-6}$                                 |
| 243        | $3.9 \times 10^{-5}$                                                                 | $9.3 \times 10^{-4}$                                                             | $7.9 \times 10^{-4}$                                                             | $1.5 \times 10^{-5}$                                 |
| 253        | $3.1 \times 10^{-5}$                                                                 | $9.5 \times 10^{-4}$                                                             | $7.8 \times 10^{-4}$                                                             | $3.8 \times 10^{-5}$                                 |
| 263        | $2.5 \times 10^{-5}$                                                                 | $9.7 \times 10^{-4}$                                                             | $7.8 \times 10^{-4}$                                                             | $8.1 \times 10^{-5}$                                 |
| 273        | $1.9 \times 10^{-5}$                                                                 | $9.8 \times 10^{-4}$                                                             | $7.8 \times 10^{-4}$                                                             | $2.1 \times 10^{-4}$                                 |
| 283        | <i>e</i>                                                                             | $9.8 \times 10^{-4}$                                                             | ————                                                                             | ————                                                 |
| 298        | <i>e</i>                                                                             | $1.0 \times 10^{-3}$                                                             | ————                                                                             | ————                                                 |

<sup>a</sup> Determined by integration of the  $^1\text{H}$  NMR signal at 3.30 ppm due to the *N*-Me protons of  $[(\text{Im}_2\text{Cz})_4\text{-Zn}^{2+}]_2$ . <sup>b</sup> Determined by integration of the  $^1\text{H}$  NMR signal at 4.46 ppm due to the  $\text{CH}_2$  proton of  $(\text{Im}_2\text{Cz})_3\text{-Zn}^{2+}$ . <sup>c</sup> Determined from the concentrations of  $[(\text{Im}_2\text{Cz})_4\text{-Zn}^{2+}]_2$ ,  $(\text{Im}_2\text{Cz})_3\text{-Zn}^{2+}$ , and  $\text{Zn}^{2+}$  in total ( $1.8 \times 10^{-3} \text{ mol dm}^{-3}$ ). <sup>d</sup> Determined from eq 1. <sup>e</sup> Too small to be determined accurately.

$$K = \frac{[(\text{Im}_2\text{Cz})_3\text{-Zn}^{2+}]^8}{[[(\text{Im}_2\text{Cz})_4\text{-Zn}^{2+}]_2]^3 [\text{Zn}^{2+}]^2} \quad (1)$$

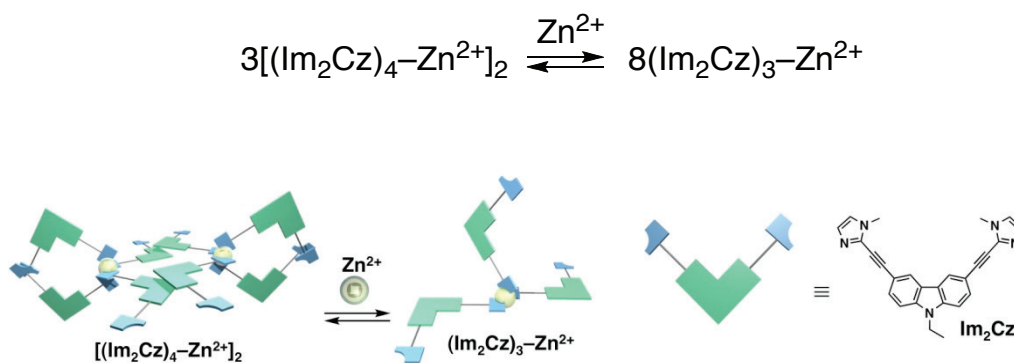

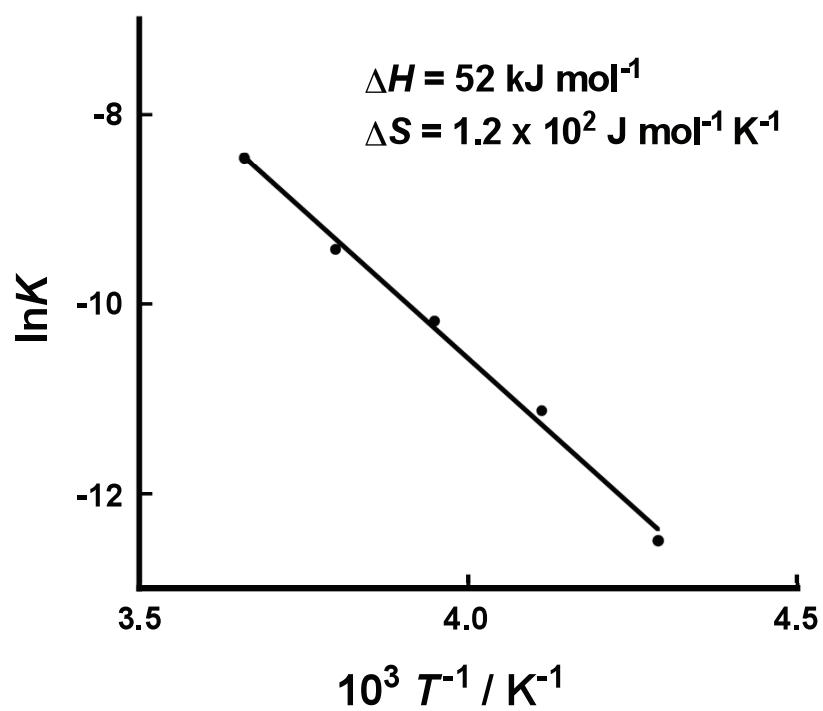

**Fig. S12** Plot of  $\ln K$  of the conversion of  $[(\text{Im}_2\text{Cz})_4\text{-Zn}^{2+}]_2$  into  $(\text{Im}_2\text{Cz})_3\text{-Zn}^{2+}$  vs.  $T^{-1}$ .
